# Supplementary material for: A Superficial Intramolecular Alignment of Carbon Nitride through Conjugated Monomer for Optimized Photocatalytic CO2 Reduction
Source: MDPI journal article supplement (doi:10.3390/catal11080935), 2021-07-30
Supplement: s1 [file s1]

Archive with 1 entries (1 files):
- catalysts-1291713-supplementary.pdf
